# Supplementary material
Source: PubMed Central journal article supplement (PMC4687792)
Supplement: EMBJ-34-3009-s001.pdf [file EMBJ-34-3009-s001.pdf]

## Expanded View Figures

A RNA-seq data *Rpp30*<sup>18.2</sup>/white virgin ovaries:

| Gene identity       | log2foldChange | pValue      |
|---------------------|----------------|-------------|
| FBgn0022246 (Rpp30) | -1.163357556   | 0.000508915 |

B Germline clones *Rpp30*<sup>18.2</sup>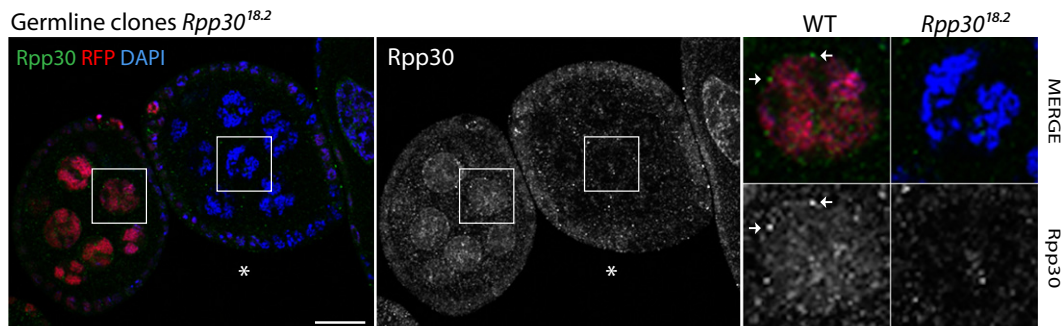C Somatic clones *Rpp30*<sup>18.2</sup>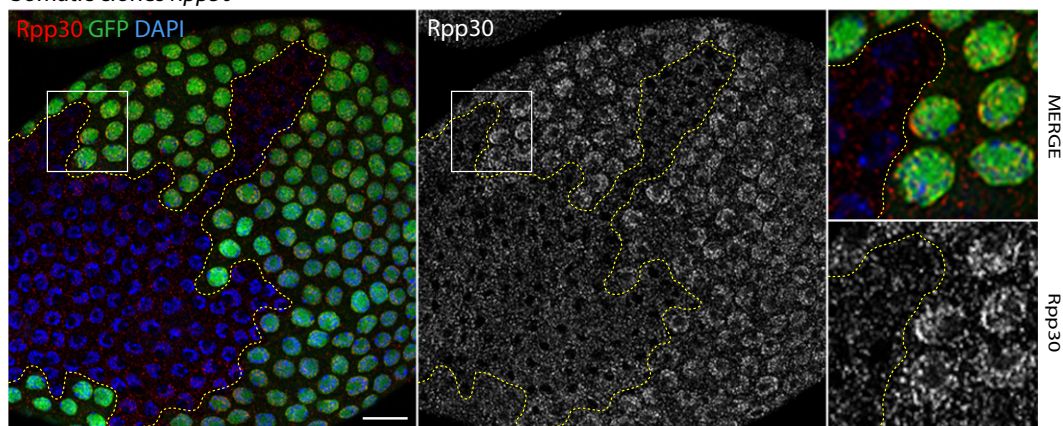D *Rpp30*<sup>18.2</sup>; *ubiRpp30GFP*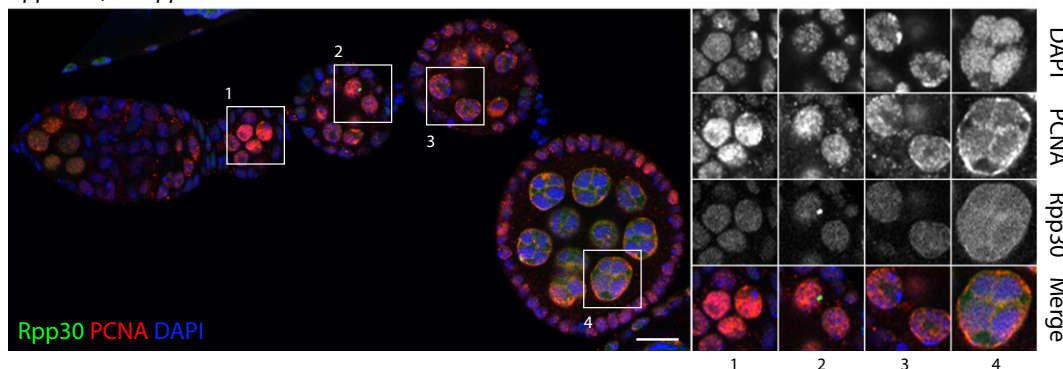

**Figure EV1.** *Rpp30* protein expression is affected in *Rpp30*<sup>18.2</sup> mutants and PCNA loss in *Rpp30*<sup>18.2</sup> ovaries is restored when overexpressing *ubiRpp30GFP* (related to Figs 1 and 3).

A Normalized fold change and *P*-value between *Rpp30*<sup>18.2</sup> mutant ovaries and *white* virgins issue from RNA-seq transcriptome analysis showing a downregulation of *Rpp30* transcripts in *Rpp30*<sup>18.2</sup> mutant ovaries.

B, C flp/FRT clones mutant for *Rpp30*<sup>18.2</sup> specifically in the germ line (B) or follicular cells (C) are detected by the absence of RFP or GFP, respectively. Magnifications show *Rpp30* absence in the nucleus of mutant cells. Perinuclear *Rpp30* foci are indicated by white arrows in a wild-type nurse cell (B). Scale bar, 10 μm.

D *Rpp30*<sup>18.2</sup> homozygous ovaries overexpressing *ubiRpp30GFP* were dissected, fixed, and stained for PCNA (red). *Rpp30GFP* is in green and DAPI is in blue. Scale bar, 10 μm.

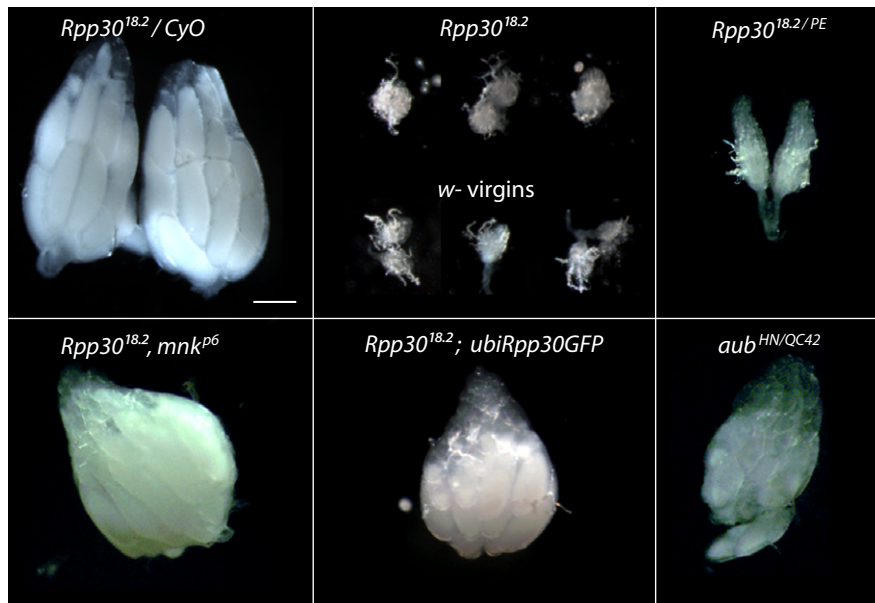

**Figure EV2. Size of ovaries used in this work (related to Figs 4–6).**

Ovaries of different genotypes used for small RNA sequencing, RNA sequencing, and ChIP analysis. The left panel of heterozygous *Rpp30*<sup>18.2</sup>/CyO ovaries has been included again in this figure (also present in Fig 1A) in order to better compare the different ovaries used altogether. Scale bar, 100  $\mu$ m.

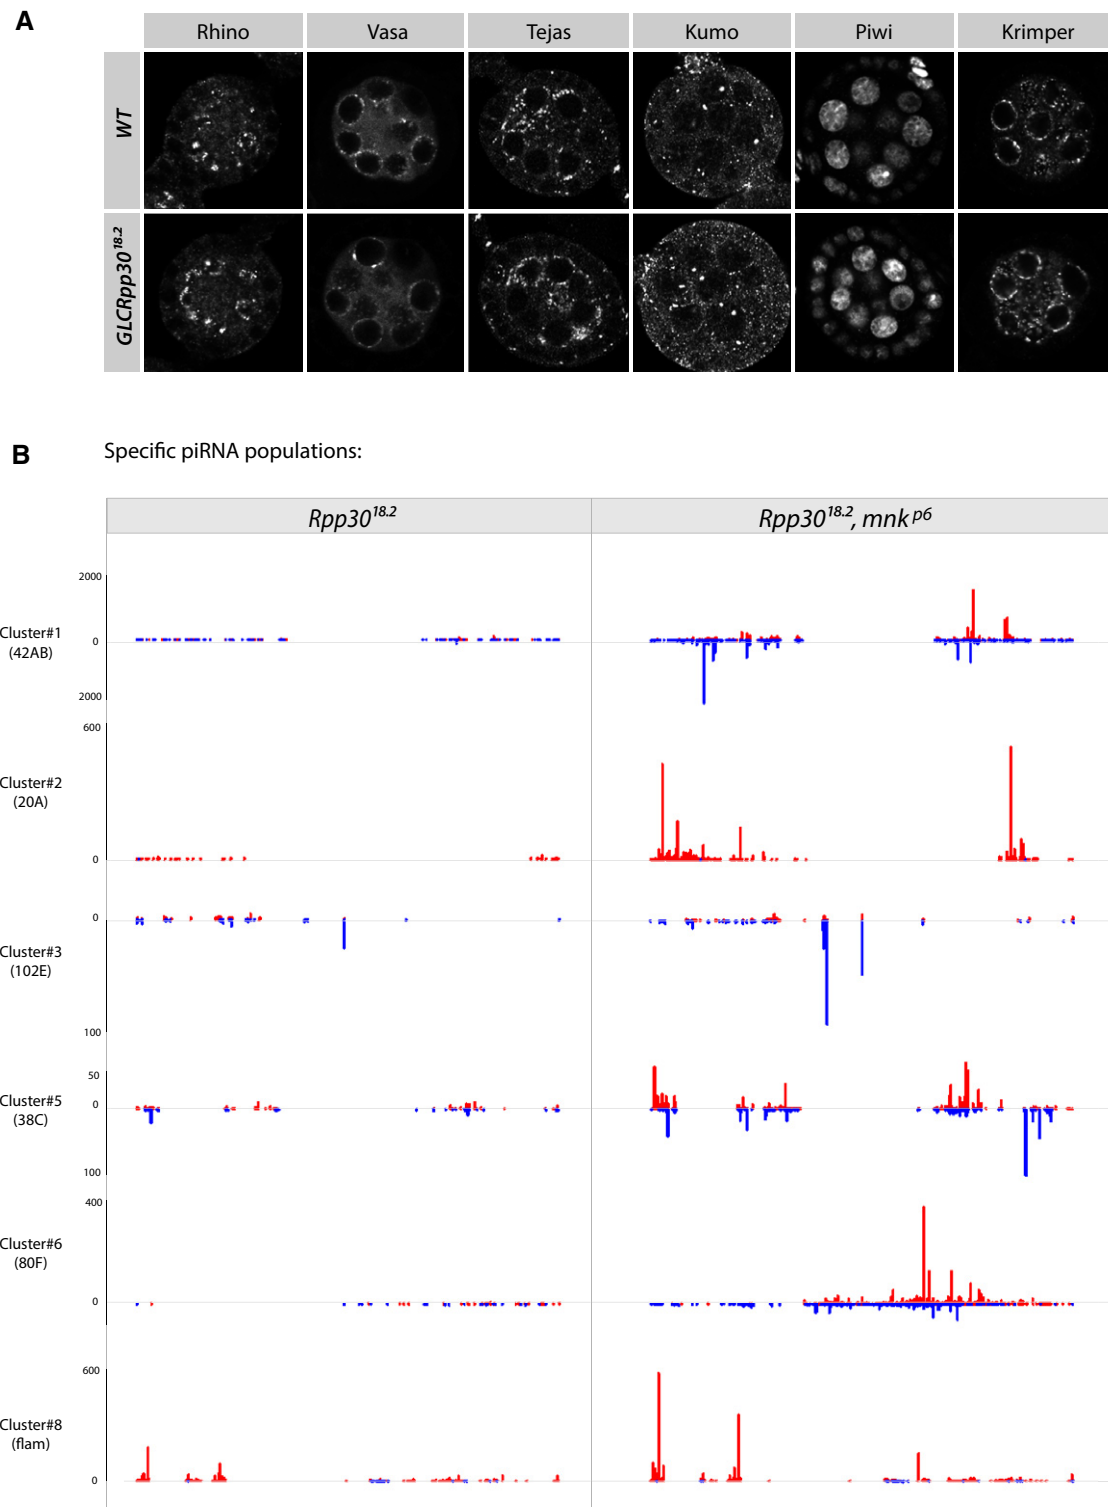

**Figure EV3. piRNAs are rescued in double mutants *Rpp30*, *chk2* (related to Fig 5).**

A Nuage-specific factors (Vasa, Tejas, Kumo, and Krimper) and Rhino and Piwi protein localizations are shown in wild-type and germ line mutant clones for *Rpp30*<sup>18.2</sup>.  
 B piRNA-specific unique mappers from different piRNA clusters are shown in *Rpp30*<sup>18.2</sup> homozygous ovaries versus *Rpp30*<sup>18.2</sup>, *mnk*<sup>p6</sup> double-mutant ovaries. The scales are indicated on the left. Red, sense. Blue, antisense.

Source data are available online for this figure.

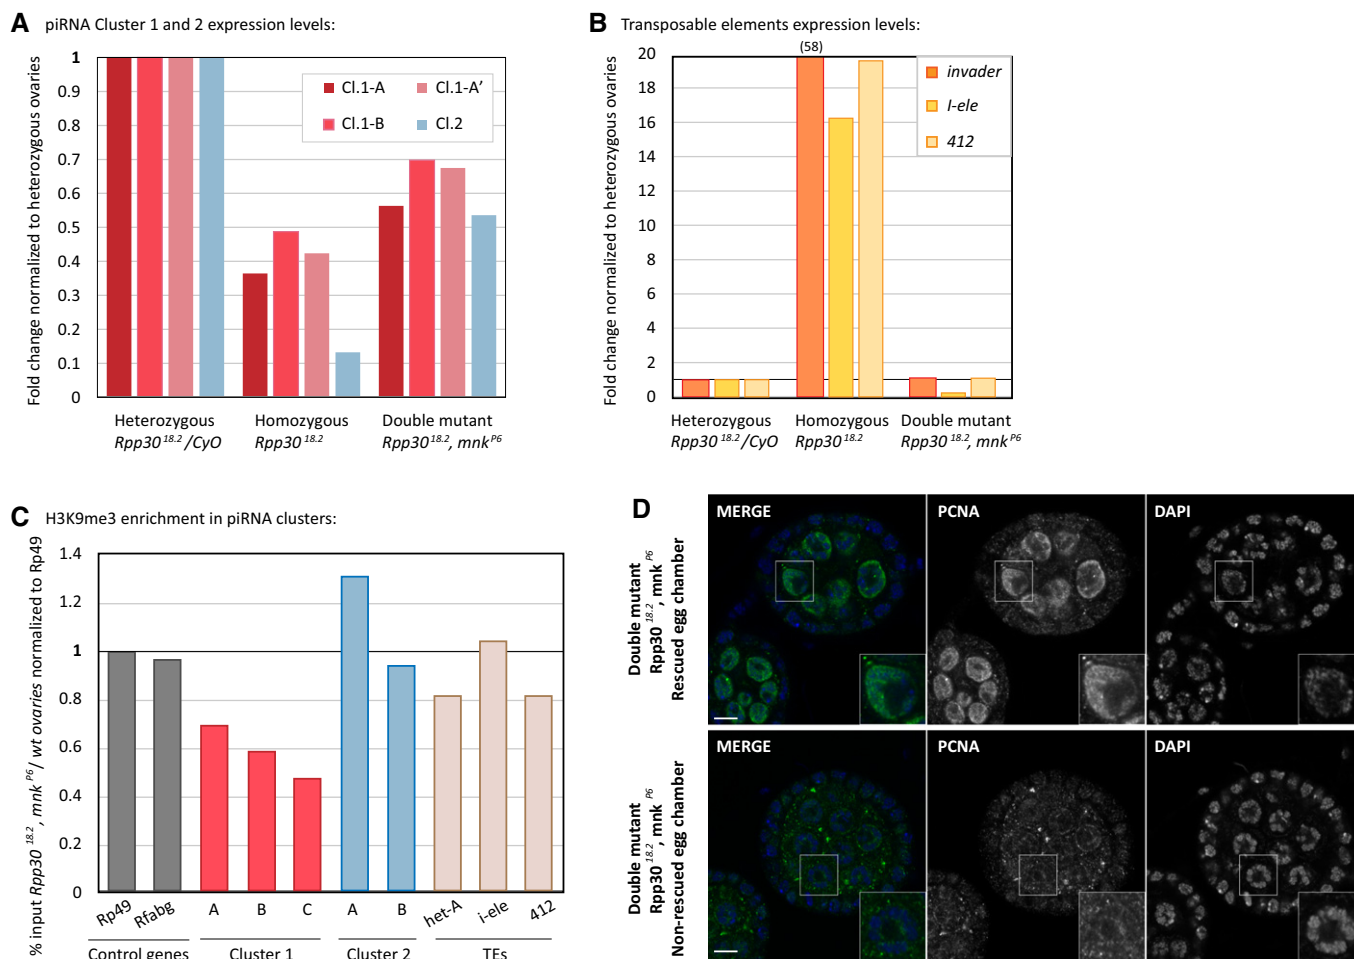

**Figure EV4. *Rpp30*, *chk2* double mutant characterization (related to Figs 3, 4, and 6).**

- A, B RNA extracted from heterozygous *Rpp30*<sup>18.2</sup>/*CyO*, homozygous *Rpp30*<sup>18.2</sup> and double mutant *Rpp30*<sup>18.2</sup>,*mnk*<sup>P6</sup> ovaries was used to study piRNA clusters 1 and 2 expression levels (A) and transposable element expression (B) by RT-qPCR.
- C About 100 ovaries from *white* and *Rpp30*<sup>18.2</sup>, *mnk*<sup>P6</sup> were used for ChIP experiments with H3K9me3 antibody. The corrected percentage of input normalized to control genes is shown as the ratio between the double mutant and the control, reflecting a rescue of methylation profiles in different regions of the two principal piRNA clusters (1 and 2) and in some TEs (Het-A, I-ele, and 412) in double-mutant ovaries.
- D Double-mutant ovaries *Rpp30*<sup>18.2</sup>, *mnk*<sup>P6</sup> were fixed and stained for PCNA. Example of one rescued and one non-rescued egg chamber are shown. Scale bar, 10  $\mu$ m.

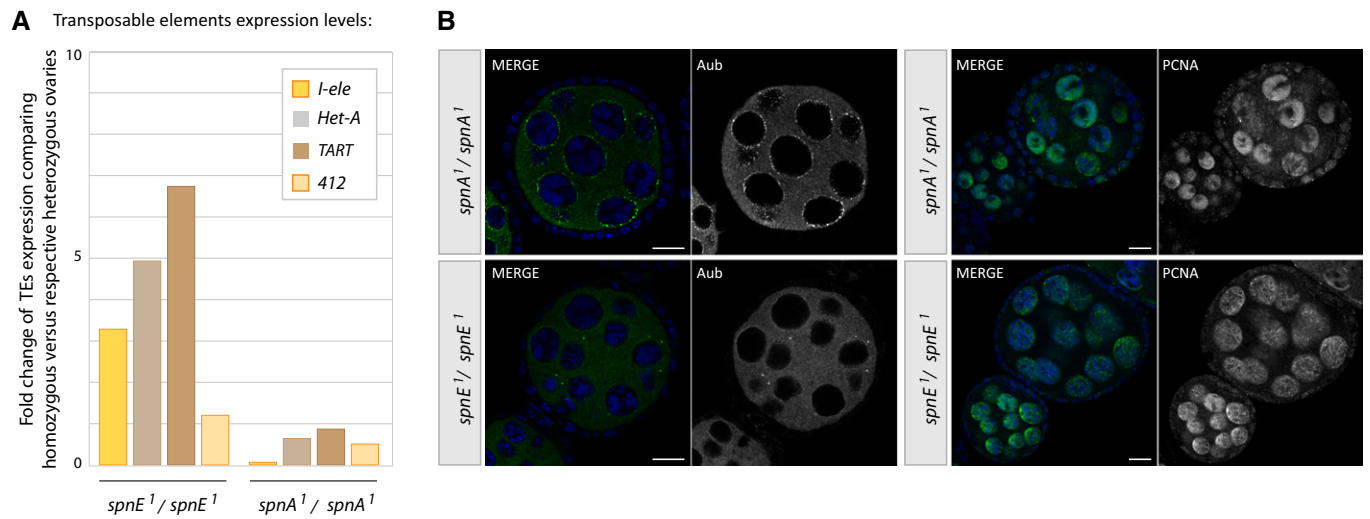

**Figure EV5. Chk2 activation by *spnA* mutation does not recapitulate *Rpp30* phenotype (related to Figs 3, 5, and 6).**

A RNA extracted from heterozygous or homozygous *spnA*<sup>1</sup> and *spnE*<sup>1</sup> flies was used to study transposable element expression by RT-qPCR. The fold change of TE expression comparing homozygous versus respective heterozygous ovaries is shown.

B Ovaries from homozygous *spnA*<sup>1</sup> and *spnE*<sup>1</sup> flies were fixed and stained for Aub (left) or PCNA (right). Scale bar, 10  $\mu$ m.
