# Supplementary material
Source: PubMed Central journal article supplement (PMC4687792)
Supplement: EMBJ-34-3009-s002.pdf [file EMBJ-34-3009-s002.pdf]

| OLIGONUCLEOTIDES USED Molla-Herman. A et al, 2015 |                                     |                                |                                 |
|---------------------------------------------------|-------------------------------------|--------------------------------|---------------------------------|
| <b>Rpp30 18.2 DNA sequencing</b>                  | <b>Sequence Forward</b>             | <b>Sequence Reverse</b>        |                                 |
| 1                                                 | 5'-GGACTGCCACCTGGTATGCTTTTC-3'      | 5'-AGCCTAAAATGGAGCAAACAAGG-3'  |                                 |
| 2                                                 | 5'-CGCCGACCACCTGCTGAAGATAACG-3'     | 5'-CAAACGTGGTCCGAGATGTTCC-3'   |                                 |
| 3                                                 | 5'-GCGTGCTCAGTTCCGCTTTGACTTC-3'     | 5'-TGGCCACGCGATGGTAGGA-3'      |                                 |
| 4                                                 | 5'-TAGTGTGACCGTGTATTGTGCC-3'        | 5'-CGGGTATAGTTAGACATGTAGTGC-3' |                                 |
| <b>Northern Blot probes</b>                       | <b>Sequence</b>                     | <b>Reference</b>               |                                 |
| tRNA-his-5'trailer                                | 5'-ACGGCTACATCGGGTAT-3'             | Dubrovsky. EB et al. NAR, 2004 |                                 |
| tRNA-his-3'trailer                                | 5'-CCCAACTCCGTGACAATGTTTGTTCACAC-3' |                                |                                 |
| tRNA-his-Internal Probe                           | 5'-GAACCTGGGTTACCACGGCCACAA-3'      |                                |                                 |
| <b>RT-qPCR for TEs</b>                            | <b>Sequence Forward</b>             | <b>Sequence Reverse</b>        | <b>Reference</b>                |
| <i>412</i>                                        | 5'-CACCGTTTGGTCGAAAG-3'             | 5'-GGACATGCCTGGTATTTTGG-3'     | Chengjian Li et al. Cell 2009   |
| <i>Accord</i>                                     | 5'-ACAATCCACCAACAGCAACA-3'          | 5'-AAAAGCCAAAATGTCGGTTG-3'     |                                 |
| <i>Accord2</i>                                    | 5'-TTGCTTTCGGACTTCGTCTT-3'          | 5'-TTCCACAACGAAAACAACCA-3'     |                                 |
| <i>Actin5c</i>                                    | 5'-AAGTTGTGCTCTGTTGTGCG-3'          | 5'-GCCACACGCAGCTCATTGTAG-3'    |                                 |
| <i>Diver2</i>                                     | 5'-CTTCAGCCAGCAAGGAAAC-3'           | 5'-CTGGCAGTCGGGTGTAATT-3'      |                                 |
| <i>gtwin</i>                                      | 5'-TTCGCACAAGCGATGATAAG-3'          | 5'-GATTGTTGACGGCGACCTT-3'      |                                 |
| <i>HeT-A</i>                                      | 5'-CGCCGCGAACCATCTTCAAGA-3'         | 5'-CGCCGCGAGTCGTTTGGTGTAGT-3'  |                                 |
| <i>Hopper</i>                                     | 5'-GGCTGGCTTCAACAAAAGAA-3'          | 5'-GGACTCCGAAAACGTCATA-3'      |                                 |
| <i>I-element</i>                                  | 5'-GACCAATAAAAAATAATACGACTTC-3'     | 5'-AACTAATTGCTGGCTTGTATG-3'    |                                 |
| <i>Invader1</i>                                   | 5'-GTACCGTITTTGAGCCGTA-3'           | 5'-AACTACGTTGCCATTCTGG-3'      |                                 |
| <i>Max</i>                                        | 5'-TCTAGCCAGTCGAGGCGTAT-3'          | 5'-TGGAAGAGTGTGCGTTTGTG-3'     |                                 |
| <i>mdg1</i>                                       | 5'-AACAGAAACGCCAGCAACAGC-3'         | 5'-CGTCCCATGTCGGTGTGAT-3'      |                                 |
| <i>Rt1a</i>                                       | 5'-CCACACAGACTGAGGCAGAA-3'          | 5'-ACGCATAACTTCCGGTTTG-3'      |                                 |
| <i>ZAM</i>                                        | 5'-ACTTGACCTGGATACACTCAACAAC-3'     | 5'-GAGTATTACGGCGACTAGGGATAC-3' |                                 |
| <i>rp49</i>                                       | 5'-CCGCTTCAAGGGACAGTATCTG-3'        | 5'-ATCTCGCCGAGTAAACGC-3'       | Olivieri. D et al. EMBO J 2010  |
| <i>Tabor</i>                                      | 5'-ACGTTGTTACGACATTAGCCG-3'         | 5'-GGGTTGGTTCGGATCTGACG-3'     |                                 |
| <i>Tart</i>                                       | 5'-TTTTCCGGATCCAAGTGAAC-3'          | 5'-TCTGGTCTGCGAAGTGTG-3'       |                                 |
| <i>G element</i>                                  | 5'-CAGAACAAGTGCCTGAGTCAATCG-3'      | 5'-GTCCAGTCGTTAGCGTATCTCTCG-3' | Klenov. MS et al. PNAS 2011     |
| <i>F element</i>                                  | 5'-AGATCCGGCAGACATTCAG-3'           | 5'-ACTTGACCATGTTTCCCCC-3'      |                                 |
| <i>Blood</i>                                      | 5'-AACAAATAGAAAAGCCACCGAAC-3'       | 5'-AGTCATGGACTATTGAGGGTGTG-3'  | Handler. D et al. Mol Cell 2011 |
| <i>copia</i>                                      | 5'-AGCAAAACACCCTCATGTC-3'           | 5'-GCAAAACCAATTTGTCTCGT-3'     | Zhao Zhang et al. Mol Cell 2011 |
| <i>Rpp30</i>                                      | 5'-CTCCATAATCTCGGGAAGTT-3'          | 5'-CAGTGCAGCAGTCTTAGATG-3'     | This study                      |
| <b>chIP qPCR for piRNA clusters</b>               | <b>Sequence Forward</b>             | <b>Sequence Reverse</b>        | <b>Reference</b>                |
| d1-A                                              | 5'-CGTCCCAGCCTACCTAGTCA-3'          | 5'-ACTTCCCGGTGAAGACTCCT-3'     | Klattenhoff.C, et al. Cell 09   |
| d1-B                                              | 5'-GCAGATGAGCTGAAACGAAA-3'          | 5'-TCGCAGTCGTGTAATCCAAA-3'     |                                 |
| d1-C                                              | 5'-CGCTGTTGAAAGCAAATTGA-3'          | 5'-GAGACCTTCGCTCCAGTGTG-3'     |                                 |
| d2-A                                              | 5'-GCCTACGCAGAGGCTAAGT-3'           | 5'-CAGATGTGGTCCAGTGTG-3'       |                                 |
| d2-B                                              | 5'-CTGCTTGTGCTTGGAGATG-3'           | 5'-TCTGCACAGATTCTGAAATTGAA-3'  |                                 |
| kismet                                            | 5'-CGCGGCTTAGAAGGTATCA-3'           | 5'-CAATCTGGATATCCGCATT-3'      | This study                      |
| rfabg                                             | 5'-AGACGTGAATCAACAGATCG-3'          | 5'-GCCAGCAGACTTAACAGTTG-3'     |                                 |
| <b>RTqPCR for piRNA clusters</b>                  | <b>Sequence Forward</b>             | <b>Sequence Reverse</b>        | <b>Reference</b>                |
| Cl.1-A                                            | 5'-CGTCCCAGCCTACCTAGTCA-3'          | 5'-ACTTCCCGGTGAAGACTCCT-3'     | Klattenhoff.C, et al. Cell 09   |
| Cl.1-A'                                           | 5'-GTTCTAGTACGTAGGCATAATTCC-3'      | 5'-AAGCAGCACTGGCTTCT-3'        | This study                      |
| Cl.1-B                                            | 5'-CTATTATTGGCACTGCTATCC-3'         | GGACCAATTAGCGCGAAGAC           | Pane Schupbach embo j 2011      |
| Cl.2-S1                                           | CGTACACTTAATGAGTTCAATTCCG           | CCAACGGAGAATGTCTAAATATGCA      | This study                      |

### Supplemental References:

Klattenhoff, C., Xi, H., Li, C., Lee, S., Xu, J., Khurana, J.S., Zhang, F., Schultz, N., Koppetsch, B.S., Nowosielska, A., et al. (2009). The Drosophila HP1 homolog Rhino is required for transposon silencing and piRNA production by dual-strand clusters. *Cell* 138, 1137-1149.

Klenov, M.S., Sokolova, O.A., Yakushev, E.Y., Stolyarenko, A.D., Mikhaleva, E.A., Lavrov, S.A., and Gvozdev, V.A. (2011). Separation of stem cell maintenance and transposon silencing functions of Piwi protein. *Proc Natl Acad Sci U S A* 108, 18760-18765.

Li, C., Vagin, V.V., Lee, S., Xu, J., Ma, S., Xi, H., Seitz, H., Horwich, M.D., Syrzycka, M., Honda, B.M., et al. (2009). Collapse of germline piRNAs in the absence of Argonaute3 reveals somatic piRNAs in flies. *Cell* 137, 509-521.

Olivieri, D., Sykora, M.M., Sachidanandam, R., Mechtler, K., and Brennecke, J. (2010). An in vivo RNAi assay identifies major genetic and cellular requirements for primary piRNA biogenesis in Drosophila. *EMBO J* 29, 3301-3317.

Zhang, Z., Xu, J., Koppetsch, B.S., Wang, J., Tipping, C., Ma, S., Weng, Z., Theurkauf, W.E., and Zamore, P.D. (2011). Heterotypic piRNA Ping-Pong requires qin, a protein with both E3 ligase and Tudor domains. *Mol Cell* 44, 572-584.
